# Supplementary material for: Two severe famines (1809–1810, 1814–1814) in Korea during the last stage of the little ice age (1809–1819)
Source: Copernicus journal article supplement (doi:10.5194/cp-2024-7), 2024-02-26
Supplement: Supplementary file [file cp-2024-7-AC1-supplement.pdf]

1 **Two severe famines (1809-1810, 1814-1815) in Korea during the last stage of the little**  
2 **ice age**

3  
4 Kim, Sung woo

5 College of General Education, Daegu Haany University, Gyeongsan City, Gyeongbuk  
6 Province, Republic of Korea 38610

7 Correspondence to: Kim, Sung woo (kswuhi@hanmail.net)

8  
9 **Abstract**

10 From the eruption of an unknown volcano in 1809 until that of Tambora in April 1815, large  
11 and small volcanoes erupted in succession, causing various climatic changes around the Earth.  
12 During this period, the monsoon climate zone of East Asia, including Korea, had a very dry  
13 summer, and the rice yield was very poor, which resulted in two severe famines that lasted until  
14 early summer in the following years. During the famines in 1809-1810 and 1814-1815, about  
15 24 percent of the population of Korea (approx. 14 million people) died. The severity of the  
16 drought varied widely depending on the region in Korea. Famine was more severe in the  
17 southern region, due to the higher degree of drought than in the northern region, resulting in  
18 deaths concentrated in southern Chōlla-do and Kyōngsang-do provinces. Based on the works  
19 of a Korean bureaucrat-scholar, Chōng Yak-yong, and official documentary data produced by  
20 the Chosōn dynasty, this article shed lights on the famines in southern regions of Korea, caused  
21 by the droughts in the last stages of the “little ice age.”

22 **Keywords:** successive volcanic eruptions, last stages of the “little ice age,” monsoon climate  
23 zone in East Asia, variation in precipitation, drought, rice farming, 1809-1810 famine, 1814-  
24 1815 famine, massive deaths

25  
26  
27 **1. Introduction**

28 Western climate academia has conducted numerous discussions on climatic-environmental  
29 changes and socio-economic impacts caused by successive eruptions of large and small  
30 volcanoes, starting from the unknown volcano in 1809 to Tambora volcano in April 1815. In  
31 particular, Western academia was interested in the climatic and environmental disasters of

32 1816-1817, known as the “year without summer.” Their studies were focused largely on falling  
33 temperatures, increasing precipitation, poor harvests, rapid increases in grain prices, and  
34 people’s protest and social unrest (Post, 1977; Wood, 2014; Brugnara et al., 2015; Raible et al.,  
35 2016).

36 However, the situation in the years 1816-1817 on the Korean peninsula was quite different  
37 from Europe and the northeastern United States. In the previous study, this author noted that  
38 Korea was significantly different from them, in that it saw moderate crop conditions, stable  
39 grain prices, and no peasant riot, though the nation experienced drops in temperature and steep  
40 rise in precipitation as Europe and the northeastern United States did (Kim, 2023). This  
41 difference was due to the fact that the West was more dependent on the farming of barley, wheat,  
42 and potatoes in dry fields (Flückiger et al., 2017), while Korea was the land of rice, a  
43 representative hydrophilic crop.

44 Western academia has succeeded in reconstructing the paleoclimate to some extent using  
45 numerous natural proxies, early instrumental measurements, and documentary evidences. As  
46 climate-related studies from China and Japan were also introduced to Western academic circles,  
47 they could have a general understanding of the situation in East Asia. However, few Korean  
48 cases have been reported, leaving the Korean situation almost blank (Burgdorf, 2022; White et  
49 al., 2018). Hence, this article accentuates the need to unearth climate-related historical data in  
50 other areas for clearer understanding of natural disasters and climate change on a global level.

51 The Chosŏn dynasty of pre-modern Korea (1392-1910) had a tradition of long-term  
52 tracking of climate change with great interest in changes in precipitation, which were critical  
53 to the growth of rice (based on Ch’ŭgugi (測雨器, rain gauge) records). In the event of a famine,  
54 the government investigated the harvest condition in each prefecture to produce the Annual  
55 crop reports (災實分等狀啓) according to its official manual and determined the size of tax-  
56 exempt land for each province. The Relief status reports (畢賑狀啓) shows the government  
57 measures to find out the number of refugees, and secure and distribute relief grains. In this  
58 process, the dynasty left behind a large number of documents that chronicled how relief  
59 measures were implemented. Korean Confucian intellectuals also recorded the disasters in  
60 detail in their diaries, letters, anthologies, and books on statecraft, and suggested ways to  
61 overcome the crisis.

62 This article took a closer look at the famine situation and the extent of damage in the  
63 southern regions of the Korean peninsula, Chōlla-do and Kyōngsang-do, where damage was  
64 concentrated during the two severe famines of 1809-1810 and 1814-1815. This study was based  
65 on official government sources and personal records of intellectuals in Korea in the 18<sup>th</sup> and  
66 19<sup>th</sup> centuries. Chapter 1 examined the evidence of climate change, crop conditions, severity  
67 of famine and the number of deaths in Kangjin prefecture and Chōlla-do province, based on  
68 the writings of Chōng Yak-yong (丁若鏞; 1762-1836), who was in exile in Kangjin at the time.  
69 Chapters 3-4 cited various data compiled and recorded by the Chosŏn government to examine  
70 the concrete aspects and extent of damage of the great famines in the southern regions of the  
71 Korean peninsula, and the impact of the two severe famines on Korean society.

72
